# Supplementary material for: Alterations of Choline Phospholipid Metabolism in Endometrial Cancer Are Caused by Choline Kinase Alpha Overexpression and a Hyperactivated Deacylation Pathway
Source: Oxford University Press journal article supplement (doi:10.1158/0008-5472.can-13-2409), 2014-09-29
Supplement: 00085472can132409-sup-117586_1_supp_2596458_n9c9cc.docx [file 00085472can132409-sup-117586_1_supp_2596458_n9c9cc.docx]

**Supplementary Data**

**Supplementary Table 1.**

**Alterations of choline phospholipid metabolism in endometrial cancer are caused by choline kinase alpha overexpression and a hyperactivated deacylation pathway**

Sebastian Trousil1, Patrizia Lee2,3, David J. Pinato3, James K. Ellis2, Roberto Dina4, Eric Aboagye1, Hector Keun2, Rohini Sharma3

1Comprehensive Cancer Imaging Centre at Imperial College, Faculty of Medicine, Imperial College London, United Kingdom

2Department of Surgery and Cancer, Imperial College London, United Kingdom

3 Department of Experimental Medicine, Imperial College London, United Kingdom

4 Department of Pathology, Imperial College NHS Trust, London, United Kingdom

**Corresponding Author:** Dr Rohini Sharma FRACP PhD, Senior Lecturer Medical Oncology and Clinical Pharmacology, Imperial College London, Hammersmith Campus, Du Cane Road, W12 0HS, London, United Kingdom, Tel: +44 208 3833720, E-mail: [r.sharma@imperial.ac.uk](mailto:r.sharma@imperial.ac.uk)

**Running title:** Choline metabolism in endometrial cancer.

**Supplementary Table 1:** Metabolic alterations in endometrial cancer.

| **Metabolite** | **Integral region (ppm)** | | | **Multiplicity** | **Direction of change** | **% Change to Control** | **p-value** |
| --- | --- | --- | --- | --- | --- | --- | --- |
| Cholesterol | 0.63 | - | 0.72 | m | ↑ | 53.43 | 0.4772 |
| Ile | 0.93 | - | 0.95 | t | ↑ | 17.26 | 0.2135 |
| Leu | 0.95 | - | 0.98 | dd | ↑ | 44.63 | 0.0059 |
| Val | 0.98 | - | 1.00 | d | ↑ | 58.88 | 0.0019 |
| Ile | 1.00 | - | 1.03 | d | ↑ | 45.47 | 0.0506 |
| Val | 1.03 | - | 1.06 | d | ↑ | 48.59 | 0.0034 |
| Lactate | 1.32 | - | 1.40 | d | ↑ | 29.70 | 0.0756 |
| Ala | 1.47 | - | 1.49 | d | ↑ | 40.26 | 0.0077 |
| Unk 1.50 | 1.49 | - | 1.54 | q | ↑ | 18.86 | 0.3284 |
| Arg, Lys, Leu | 1.62 | - | 1.80 | m | ↑ | 9.19 | 0.7223 |
| Arg, Lys, Leu | 1.87 | - | 1.92 | m | ↑ | 30.52 | 0.3284 |
| Acetate | 1.92 | - | 1.93 | s | ↓ | -9.33 | 0.3743 |
| Arg | 1.93 | - | 1.95 | m | ↑ | 12.53 | 0.7223 |
| R 2.0 | 1.97 | - | 2.10 | m | ↑ | 26.43 | 0.0100 |
| Pro | 1.97 | - | 2.03 | m | ↑ | 54.97 | 0.0019 |
| R 2.1 | 2.10 | - | 2.19 | m | ↓ | -24.27 | 0.0621 |
| Acetoacetate | 2.23 | - | 2.24 | s | ↑ | 2.20 | 0.5340 |
| Glu | 2.30 | - | 2.40 | m | ↓ | -11.03 | 0.3284 |
| Glu | 2.30 | - | 2.40 | m | ↓ | -10.89 | 0.3284 |
| Unk 2.41 | 2.40 | - | 2.42 | s | ↓ | -10.94 | 0.3743 |
| Gln | 2.43 | - | 2.49 | m | ↓ | -10.21 | 0.3284 |
| GSH | 2.51 | - | 2.61 | m | ↓ | -43.86 | 0.0019 |
| Asp | 2.65 | - | 2.71 | dd | ↓ | -19.04 | 0.1551 |
| Asp | 2.79 | - | 2.84 | dd | ↑ | 87.65 | 0.1551 |
| GSH | 2.91 | - | 2.98 | m | ↓ | -37.64 | 0.0209 |
| Creatine, Creatinine | 3.03 | - | 3.04 | 2s | ↓ | -22.76 | 0.1097 |
| Unk 3.20 | 3.19 | - | 3.20 | s | ↑ | 84.07 | 0.0005 |
| Cho | 3.20 | - | 3.21 | s | ↑ | 1.75 | 0.8590 |
| R 3.22 | 3.22 | - | 3.24 | m | ↑ | 39.79 | 0.0621 |
| GPC, PCho | 3.22 | - | 3.24 | 2s | ↑ | 49.23 | 0.0330 |
| PCho | 3.22 | - | 3.23 | s | ↑ | 69.99 | 0.0100 |
| GPC | 3.23 | - | 3.24 | s | ↑ | 17.94 | 0.3284 |
| Taurine, myoinositol | 3.25 | - | 3.30 | 2t | ↓ | -30.02 | 0.0045 |
| Scyllo-inositol | 3.34 | - | 3.35 | s | ↓ | -60.12 | 0.0019 |
| Unk 3.35 | 3.35 | - | 3.38 | s | ↓ | -78.99 | 0.0077 |
| Taurine | 3.41 | - | 3.45 | t | ↓ | -25.04 | 0.0263 |
| Myo-inositol | 3.52 | - | 3.55 | dd | ↓ | -57.82 | 0.0005 |
| Gly | 3.55 | - | 3.56 | s | ↓ | -5.86 | 0.3284 |
| R 3.78 | 3.76 | - | 3.80 | m | ↓ | -19.92 | 0.1551 |
| beta-glucose | 3.88 | - | 3.92 | dd | ↓ | -13.03 | 0.1826 |
| Creatine | 3.92 | - | 3.95 | s | ↓ | -17.18 | 0.2481 |
| Serine | 3.95 | - | 3.97 | d | ↑ | 27.02 | 0.0621 |
| PE | 3.97 | - | 4.04 | td | ↓ | -6.25 | 0.4772 |
| Myo-inositol | 4.05 | - | 4.09 | t | ↓ | -60.90 | 0.0004 |
| Lactate | 4.09 | - | 4.14 | q | ↑ | 8.88 | 0.6569 |
| GPC | 4.31 | - | 4.34 | m | ↓ | -13.50 | 0.2135 |
| Inosine/adenosine | 4.43 | - | 4.45 | dd | ↓ | -43.51 | 0.0010 |
| Ascorbate | 4.51 | - | 4.53 | d | ↓ | -22.86 | 0.0914 |
| GSH | 4.56 | - | 4.61 | dd? | ↓ | -43.91 | 0.0129 |
| beta-glucose | 4.63 | - | 4.66 | d | ↓ | -39.14 | 0.0506 |
| alpha-glucose | 5.22 | - | 5.26 | d | ↑ | 35.41 | 0.4239 |
| Unsaturated lipids | 5.26 | - | 5.39 | m | ↑ | 3419.99 | 0.0034 |
| Lipids | 5.40 | - | 5.45 |  | ↑ | 491.07 | 0.4239 |
| Uridine | 5.88 | - | 5.94 | dd | ↓ | -26.45 | 0.5940 |
| Inosine/adenosine | 6.09 | - | 6.12 | d | ↓ | -60.62 | 0.0019 |
| Tyr | 6.87 | - | 6.92 | d | ↑ | 79.09 | 0.0077 |
| Tyr | 7.17 | - | 7.22 | d | ↑ | 45.02 | 0.1097 |
| Phe | 7.31 | - | 7.35 | d | ↑ | 25.93 | 0.0621 |
| Phe | 7.35 | - | 7.40 | m | ↑ | 1.95 | 0.9292 |
| Phe | 7.40 | - | 7.45 | m | ↑ | 511.63 | 0.0004 |
| Uridine | 7.87 | - | 7.91 | d | ↑ | 5.84 | 0.9292 |
| Unk 7.95 | 7.93 | - | 8.00 |  | ↑ | 307.75 | 0.0506 |
| Unk 8.0 | 8.00 | - | 8.02 | s | ↓ | -34.25 | 0.2863 |
| Hypoxanthine | 8.18 | - | 8.20 | s | ↑ | 32.01 | 0.2863 |
| Unk 8.2 | 8.20 | - | 8.23 | s | ↑ | 521.08 | 0.0034 |
| Inosine/adenosine | 8.23 | - | 8.25 | s | ↓ | -54.04 | 0.0025 |
| Inosine/adenosine | 8.34 | - | 8.37 | s | ↓ | -58.09 | 0.0025 |
| Formate | 8.45 | - | 8.46 | s | ↑ | 13.41 | 0.0914 |

The integral region indicates the signal that was selected for univariate testing. Fold changes are based on mean values in each tissue type. *P* values are derived from Mann-Whitney U test. Abbreviations: amino acids are abbreviated according to standard nomenclature; s-singlet; d-doublet; dd-double doublet; m-multiplet.
